# Supplementary material for: Single-domain antibody C7b for address delivery of nanoparticles to HER2-positive cancers
Source: Royal Society of Chemistry journal article supplement (doi:10.1039/d0nr04899b), 2020-01-01
Supplement: d0nr04899b1.pdf [file d0nr04899b1.pdf]

## Supporting Information

### Single-domain antibody C7b for address delivery of nanoparticles to HER2-positive cancers

*Yuri A. Vorotnikov,<sup>a</sup> Evgeniya D. Novikova,<sup>a</sup> Anastasiya O. Solovieva,<sup>b</sup> Daniil V. Shanshin,<sup>c</sup> Alphiya R. Tsygankova,<sup>a</sup> Dmitrii N. Shcherbakov,<sup>c</sup> Olga A. Efremova<sup>b,d\*</sup> and Michael A. Shestopalov<sup>a\*</sup>*

<sup>a</sup>*Nikolaev Institute of Inorganic Chemistry SB RAS, 3 Acad. Lavrentiev Ave., 630090 Novosibirsk, Russian Federation*

<sup>b</sup>*Research Institute of Clinical and Experimental Lymphology – branch of ICG SB RAS, 2 Timakova str., 630060 Novosibirsk, Russian Federation*

<sup>c</sup>*State Research Center of Virology and Biotechnology VECTOR, 630559 Koltsovo, Russian Federation*

<sup>d</sup>*The Federal Research Center of Fundamental and Translational Medicine, 2 Timakova st., 630117 Novosibirsk, Russian Federation*

**\*Olga A. Efremova**

*Tel.: +44 7583012446.*

*E-mail address: olgaa.efremova@gmail.com*

**\*Michael A. Shestopalov**

*Tel.: +7-383-330-9253; Fax: +7-383-330-9489.*

*E-mail address: shtopy@niic.nsc.ru*

## Content

|                                                                |    |
|----------------------------------------------------------------|----|
| TEM images .....                                               | S3 |
| Nucleotide sequences before and after codon optimisation ..... | S4 |
| Plasmid maps .....                                             | S5 |
| Confocal microscopic images .....                              | S6 |

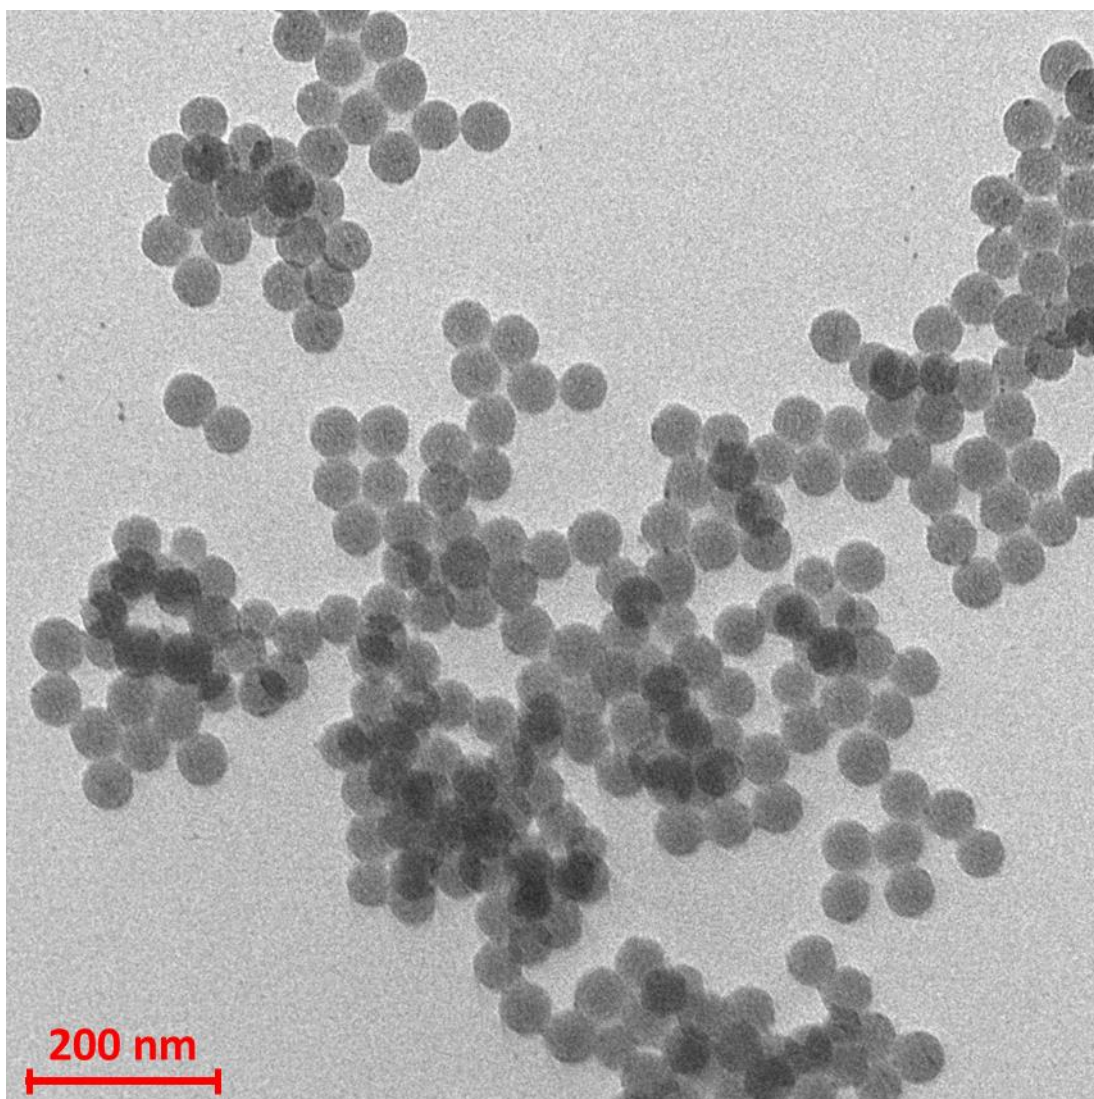

**Figure S1.** TEM images of  $\{\text{Mo}_6\text{I}_8\}@ \text{SiO}_2$  nanoparticles.

```

          10         20         30         40         50
C7b      .....|.....|.....|.....|.....|.....|.....|.....|
C7b-CO   ATGCAGGTTTCAGCTGGTTCAGAGCGGTGGTGGTCTGGTTCAGGCAGGCGG

          60         70         80         90        100
C7b      .....|.....|.....|.....|.....|.....|.....|.....|
C7b-CO   TAGCCTGCGTCTGAGCTGTGCAGCAAGCGGTCGTACCTTTAGCAGCTATG

          110        120        130        140        150
C7b      .....|.....|.....|.....|.....|.....|.....|.....|
C7b-CO   CAATGGCATGGTTTCGTCAGGCACCGGGTAAAGAACGTGAATTTGTTGCA

          160        170        180        190        200
C7b      .....|.....|.....|.....|.....|.....|.....|.....|
C7b-CO   GCAATTAGCTGGTTCAGGTGCCAACATTTATGTTGCAGATAGCGTTAAAGG

          210        220        230        240        250
C7b      .....|.....|.....|.....|.....|.....|.....|.....|
C7b-CO   TCGCTTTACCATTAGCCGTGATAATGCAAAAGATACCGTTTACCTGCAGA

          260        270        280        290        300
C7b      .....|.....|.....|.....|.....|.....|.....|.....|
C7b-CO   TGAATAGCCTGAAACCGGAAGATACCGCAGTGTATTATTGTGCAGTTAAA

          310        320        330        340        350
C7b      .....|.....|.....|.....|.....|.....|.....|.....|
C7b-CO   CTGGGTTTTGCAACCGGTGGAAGAACGTCAGTATGATTATTGGGGTCAGGG

          360        370        380        390        400
C7b      .....|.....|.....|.....|.....|.....|.....|.....|
C7b-CO   CACCCAGGTTACCGTTAGCAGCGGTAGCGGTAGTGGTGTGATCATCATC

          410        420        430        440        450
C7b      .....|.....|.....|.....|.....|.....|.....|.....|
C7b-CO   ACCATCATCATGGTAGCGGTTTCAGGTCTGAAATGATATTTTTGAAAGCCCAG

          460
C7b      .....|.....|.....|.....|.....|.....|.....|.....|
C7b-CO   AAAATCGAATGGCACGAA

```

Figure S2. Nucleotide sequences before (C7b) and after (C7b-CO) codon optimisation.

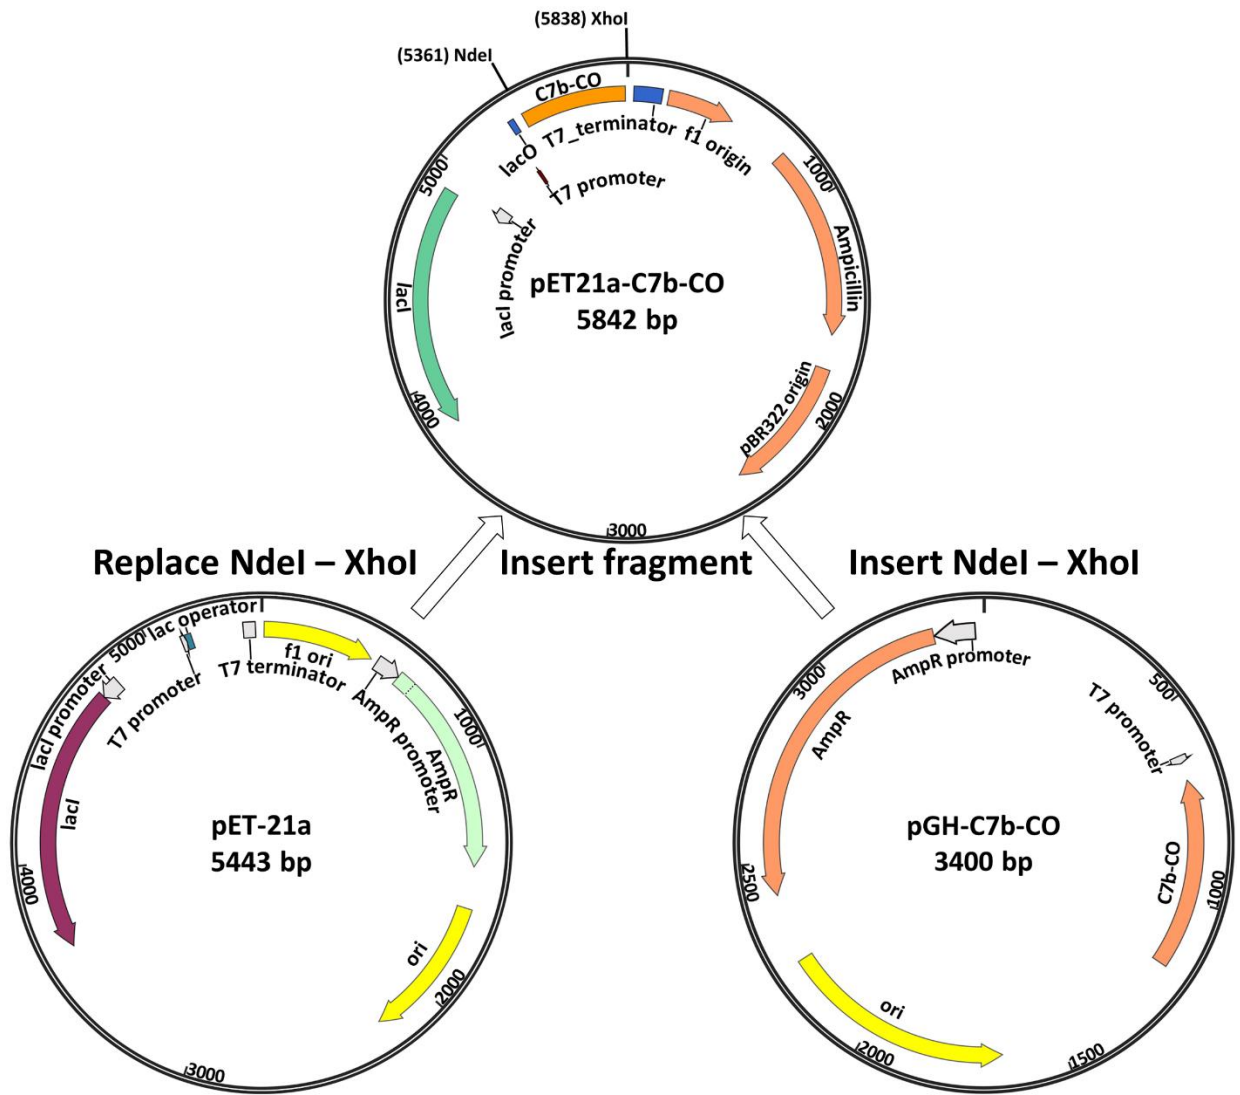

**Figure S3.** Stages of embedding the optimised nucleotide sequence of a sdAb C7b (C7b-CO) in the expression vector pET-21a.



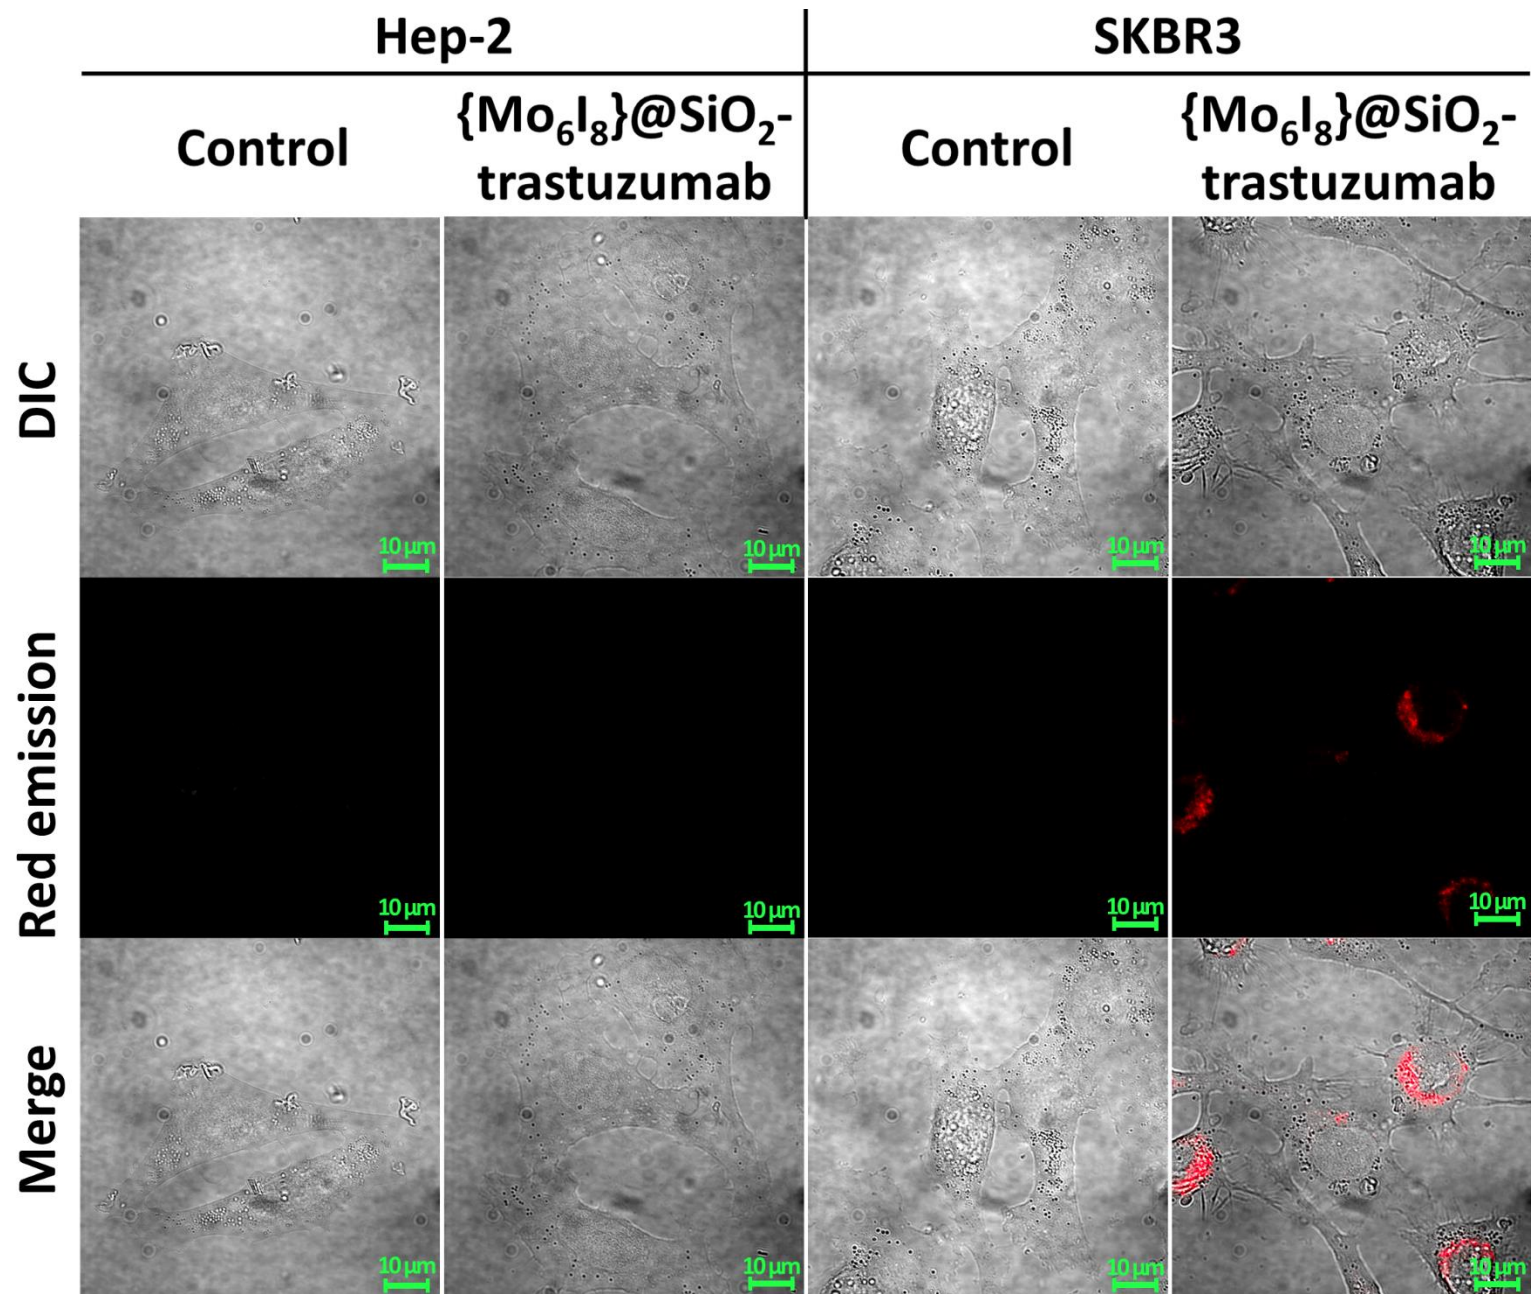

**Figure S4.** Confocal microscopic images of control Hep-2 and SKBR3 cells and cells incubated with {Mo<sub>6</sub>I<sub>8</sub>}@SiO<sub>2</sub>-trastuzumab for 15 min.
